# Supplementary material for: Direct Stenting versus Conventional Stenting in Patients with ST-Segment Elevation Myocardial Infarction—A COMPARE CRUSH Sub-Study
Source: MDPI journal article supplement (doi:10.3390/jcm12206645), 2023-10-20
Supplement: s1 [file s1]

|                               |                                                                                                                                                      |
|-------------------------------|------------------------------------------------------------------------------------------------------------------------------------------------------|
| <b>Supplementary table S1</b> | Crude reperfusion and clinical outcomes in direct stenting versus conventional stenting                                                              |
| <b>Supplementary table S2</b> | Baseline characteristics in direct stenting versus conventional stenting patients with high thrombus burden on initial angiography                   |
| <b>Supplementary table S3</b> | Crude reperfusion and clinical outcomes of direct stenting versus conventional stenting in patients with high thrombus burden on initial angiography |

**Supplementary table S1.** Crude reperfusion and clinical outcomes in direct stenting versus conventional stenting

|                                                                                                     | <b>DS</b>          | <b>CS</b>          | <b>Odds ratio (95%CI)</b> | <b>p-value</b> |
|-----------------------------------------------------------------------------------------------------|--------------------|--------------------|---------------------------|----------------|
| <b>Stent dimensions in culprit lesion</b>                                                           |                    |                    |                           |                |
| Cumulative stent length – mm                                                                        | 23 [18 – 33] / 163 | 32 [23 – 48] / 239 | -                         | <0.001         |
| Diameter – mm                                                                                       | 3.22 ± 0.48 / 163  | 3.15 ± 0.48 / 239  | -                         | 0.17           |
| One DES – no. (%)                                                                                   | 121 (73.8) / 164   | 131 (54.6) / 240   | 2.34 [1.52 – 3.60]        | <0.001         |
| <b>Early reperfusion parameters post-PCI</b>                                                        |                    |                    |                           |                |
| TIMI 3 flow in the IRA – no. (%)                                                                    | 165/178 (92.7)     | 216/239 (90.4)     | 1.35 [0.67 – 2.75]        | 0.41           |
| TIMI blush grade 3 – no. (%)                                                                        | 76/117 (65.0)      | 78/140 (55.7)      | 1.47 [0.89 – 2.44]        | 0.13           |
| cTFC in the IRA – frames/second                                                                     | 17 [11 – 25] / 164 | 19 [13 – 29] / 215 | -                         | 0.02           |
| cTFC ≤ 23 frames/sec – no. (%)                                                                      | 111/160 (69.4)     | 134/215 (62.3)     | 1.37 [0.89 – 2.12]        | 0.16           |
| Complete ST-segment resolution – no. (%)                                                            | 120/167 (71.9)     | 119/205 (58.0)     | 1.85 [1.19 – 2.86]        | <0.01          |
| <b>Clinical outcomes (1 year) – no. (%)</b>                                                         |                    |                    |                           |                |
| All-cause mortality                                                                                 | 0/184 (0.0)        | 8/248 (3.2)        | -                         | 0.02*          |
| Cardiac death                                                                                       | 0/184 (0.0)        | 3/248 (1.2)        | -                         | 0.27*          |
| Myocardial re-infarction                                                                            | 9/184 (4.9)        | 8/248 (3.2)        | 1.54 [0.58 – 4.08]        | 0.38           |
| Target lesion failure                                                                               | 4/184 (2.2)        | 3/248 (1.2)        | 1.81 [0.40 – 8.21]        | 0.47*          |
| Stent thrombosis                                                                                    | 1/184 (0.5)        | 2/248 (0.8)        | 0.67 [0.06 – 7.50]        | 1.00*          |
| Stroke                                                                                              | 0/184 (0.0)        | 3/248 (1.2)        | -                         | 0.27*          |
| Urgent revascularization                                                                            | 8/184 (4.3)        | 5/248 (2.0)        | 2.21 [0.71 – 6.87]        | 0.17           |
| Target lesion revascularization                                                                     | 2/184 (1.1)        | 2/248 (0.8)        | 1.35 [0.19 – 9.69]        | 1.00*          |
| Composite of death and stent thrombosis                                                             | 1/184 (0.5)        | 10/248 (4.0)       | 0.13 [0.02 – 1.03]        | 0.054          |
| Composite of death, myocardial re-infarction, stroke, stent thrombosis and urgent revascularization | 11/184 (6.0)       | 18/248 (7.3)       | 0.80 [0.37 – 1.76]        | 0.60           |

\* p-value calculated with Fisher's exact test

CI – confidence interval; TIMI – thrombolysis in myocardial infarction; IRA – infarct-related artery; PCI – percutaneous coronary intervention; cTFC – corrected TIMI frame count.

**Supplementary table S2.** Baseline characteristics of direct stenting versus conventional stenting in patients with high thrombus burden on initial angiography

|                                | <b>DS<br/>(n=150)</b> | <b>CS<br/>(n=199)</b> | <b>p-value</b> |
|--------------------------------|-----------------------|-----------------------|----------------|
| <b>Patient characteristics</b> |                       |                       |                |
| <b>Demographics</b>            |                       |                       |                |
| Age – years                    | 60 + 12               | 64 + 11               | 0.007          |
| Female sex – no. (%)           | 39 (26.0)             | 45 (22.6)             | 0.46           |
| Caucasian – no. (%)            | 133 (89.3) / 149      | 182 (92.4) / 197      | 0.31           |
| BMI - kg/m <sup>2</sup>        | 28 + 5 / 95           | 27 + 4 / 140          | 0.29           |

|                                               |                 |                 |        |
|-----------------------------------------------|-----------------|-----------------|--------|
| Cardiovascular risk factors – no. (%)         |                 |                 |        |
| Hypertension                                  | 47 (31.5) / 149 | 77 (39.5) / 195 | 0.13   |
| Diabetes mellitus                             | 25 (17.0) / 247 | 32 (16.2) / 197 | 0.85   |
| Dyslipidemia                                  | 30 (21.4) / 140 | 49 (25.8) / 190 | 0.36   |
| Smoking                                       | 65 (45.5) / 143 | 83 (43.0) / 193 | 0.66   |
| Family history of cardiovascular disease      | 51 (35.9) / 142 | 82 (43.6) / 188 | 0.16   |
| Medical history                               |                 |                 |        |
| Previous PCI                                  | 12 (8.0) / 150  | 24 (12.1) / 198 | 0.21   |
| Previous myocardial infarction                | 7 (4.7) / 150   | 19 (9.6) / 198  | 0.08   |
| Presentation                                  |                 |                 |        |
| Onset symptoms to first medical contact – min | 50 [29 – 109]   | 64 [30 – 116]   | 0.09   |
| Crushed prasugrel – no. (%)                   | 68 (45.3)       | 95 (47.7)       | 0.66   |
| <b>Procedural characteristics</b>             |                 |                 |        |
| Culprit vessel – no. (%)                      |                 |                 |        |
| LAD                                           | 49 (32.7) / 150 | 81 (40.9) / 198 | 0.12   |
| Cx                                            | 23 (15.3) / 150 | 37 (18.7) / 198 | 0.41   |
| RCA                                           | 76 (50.7) / 150 | 78 (39.4) / 198 | 0.036  |
| Multivessel disease – no. (%)                 | 62 (41.3) / 150 | 91 (45.7) / 198 | 0.41   |
| <b>Angiographic parameters pre-PCI</b>        |                 |                 |        |
| Onset symptoms to wire crossing – min         | 131 [101 – 192] | 150 [111 – 220] | 0.06   |
| TIMI 3 flow IRA pre-PCI – no.(%)              | 58 (39.2) / 148 | 41 (20.6) / 199 | <0.001 |
| Postdilatation                                | 75 (50.0)       | 124 (62.3)      | 0.021  |
| Total procedural time – min                   | 28 [23 – 39]    | 35 [27 – 49]    | <0.001 |

BMI – body mass index; PCI – percutaneous coronary intervention; LAD – left anterior descending; Cx – circumflex; RCA – right coronary artery; TIMI – thrombolysis in myocardial infarction; IRA – infarct-related artery.

**Supplementary table S3.** Crude reperfusion and clinical outcomes of direct stenting versus conventional stenting in patients with high thrombus burden on initial angiography

|                                              | <b>DS</b>      | <b>CS</b>      | <b>Odds ratio (95%CI)</b> | <b>p-value</b> |
|----------------------------------------------|----------------|----------------|---------------------------|----------------|
| <b>Stent dimensions in culprit lesion</b>    |                |                |                           |                |
| Cumulative stent length – mm                 | 23 [28 – 31]   | 32 [23 – 47]   | -                         | <0.001         |
| Diameter - mm                                | 3.23 ± 0.48    | 3.15 ± 0.50    | -                         | 0.18           |
| One DES – no. (%)                            | 100/129 (77.5) | 107/184 (58.2) | 2.48 [1.50 – 4.12]        | <0.001         |
| <b>Early reperfusion parameters post-PCI</b> |                |                |                           |                |
| TIMI 3 flow in the IRA – no. (%)             | 132 (91.7)     | 173 (91.5)     | 1.02 [0.47 – 2.22]        | 0.97           |
| TIMI blush grade 3 – no. (%)                 | 62 (62.6)      | 59 (53.6)      | 1.45 [0.83 – 2.52]        | 0.19           |
| cTFC – frames/second                         | 16 [12 – 24]   | 20 [13 – 29]   | -                         | 0.018          |
| cTFC ≤ 23 frames/sec – no. (%)               | 92/129 (71.3)  | 106/175 (60.6) | 1.62 [0.99 – 2.64]        | 0.053          |
| Complete ST-segment resolution – no. (%)     | 95 (72.0)      | 93 (58.5)      | 1.82 [1.11 – 2.99]        | 0.017          |
| <b>Clinical outcomes (1 year) – no. (%)</b>  |                |                |                           |                |
| All-cause mortality                          | 0/147 (0.0)    | 3/193 (1.6)    | -                         | 0.26*          |

|                                                                                                     |             |              |                    |       |
|-----------------------------------------------------------------------------------------------------|-------------|--------------|--------------------|-------|
| Cardiac death                                                                                       | 0/147 (0.0) | 1/193 (0.5)  | -                  | 1.00* |
| Myocardial re-infarction                                                                            | 7/147 (4.8) | 7/193 (3.6)  | 1.33 [0.46 – 3.87] | 0.60  |
| Target lesion failure                                                                               | 4/147 (2.7) | 3/193 (1.6)  | 1.73 [0.38 – 7.87] | 0.47* |
| Stent thrombosis                                                                                    | 1/147 (0.7) | 2/193 (1.0)  | 0.65 [0.06 – 7.28] | 1.00* |
| Stroke                                                                                              | 0/147 (0.0) | 1/193 (0.5)  | -                  | 1.00* |
| Urgent revascularization                                                                            | 5/147 (3.4) | 3/193 (1.6)  | 2.23 [0.52 – 9.49] | 0.30* |
| Target lesion revascularization                                                                     | 2/147 (1.4) | 2/193 (1.0)  | 1.32 [0.18 – 9.46] | 1.00* |
| Composite of death and stent thrombosis                                                             | 1/147 (0.7) | 5/193 (2.6)  | 0.26 [0.03 – 2.22] | 0.24* |
| Composite of death, myocardial re-infarction, stroke, stent thrombosis and urgent revascularization | 8/147 (5.4) | 11/193 (5.7) | 0.95 [0.37 – 2.43] | 0.92  |

\* p-value calculated with Fisher's exact test

DS – direct stenting; CS – conventional stenting; CI – confidence interval; TIMI – thrombolysis in myocardial infarction; IRA – infarct-related artery; PCI – percutaneous coronary intervention; cTFC – corrected TIMI frame count.
